# Supplementary material for: Thermoplastic zwitterionic elastomer with critical antifouling properties
Source: Royal Society of Chemistry journal article supplement (doi:10.1039/d2bm00190j), 2022-01-01
Supplement: d2bm00190j1.pdf [file d2bm00190j1.pdf]

## Supplementary Information

### Thermoplastic zwitterionic elastomer with critical antifouling properties

Kun Wang,<sup>1</sup> Theo,<sup>2</sup> Ardith Huner,<sup>2</sup> Hyang Seol,<sup>1</sup> Xuan Liu,<sup>1</sup> Huifeng Wang,<sup>1</sup> Lena Hassan,<sup>1</sup>  
Karthika Suresh,<sup>1</sup> Sangil Kim<sup>1\*</sup> and Gang Cheng<sup>1\*</sup>

1. Department of Chemical Engineering, University of Illinois Chicago, Chicago, IL 60607,  
USA

2. University of Chicago Laboratory Schools, Chicago, IL 60637

\*Corresponding Authors: [sikim@uic.edu](mailto:sikim@uic.edu), [gancheng@uic.edu](mailto:gancheng@uic.edu)

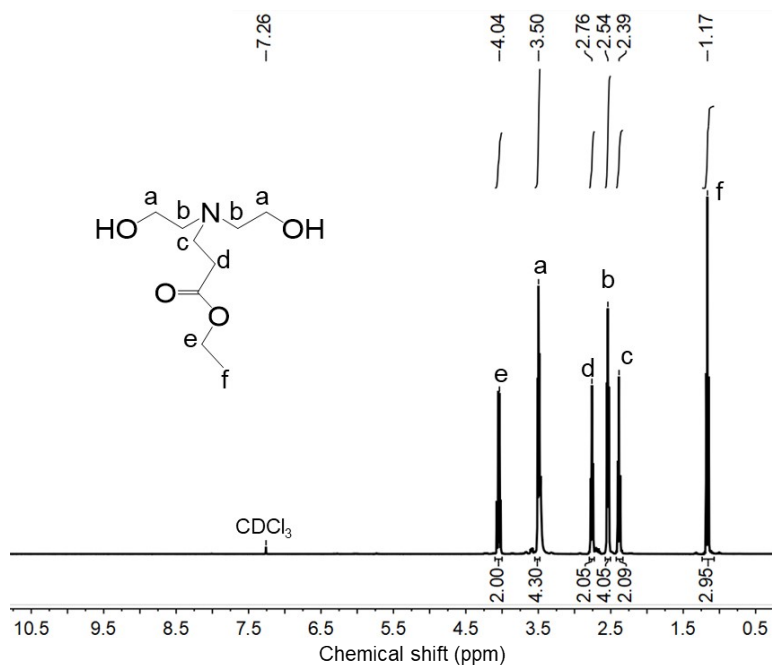

Figure S1. <sup>1</sup>H NMR spectrum for DEAEA.

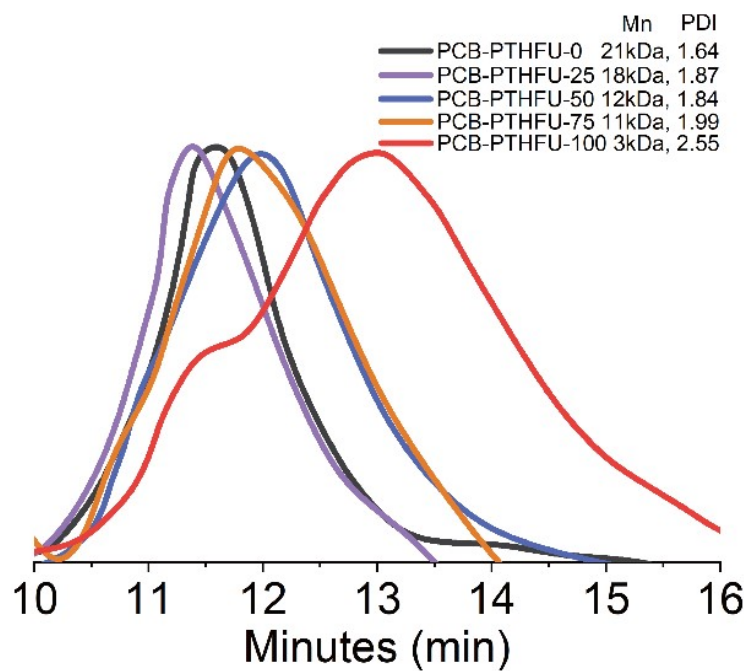

Figure S2. GPC curves of PCB-PTHFU-0, PCB-PTHFU-25, PCB-PTHFU-50, PCB-PTHFU-75, and PCB-PTHFU-100.

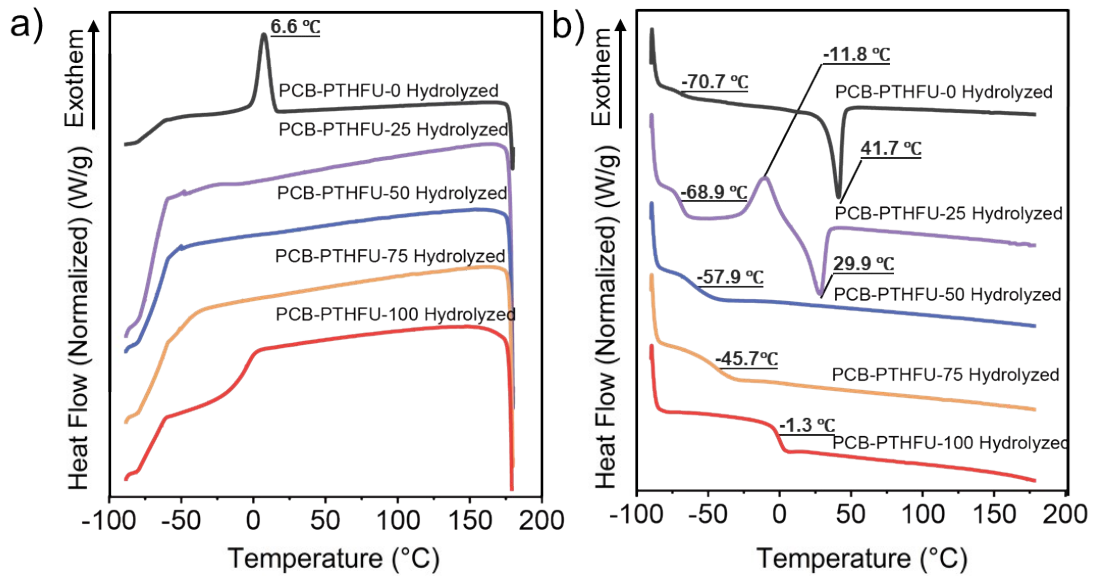

Figure S3. DSC profile of a) the cooling curve and b) the heating curve of hydrolyzed PCB-PTHFUs.

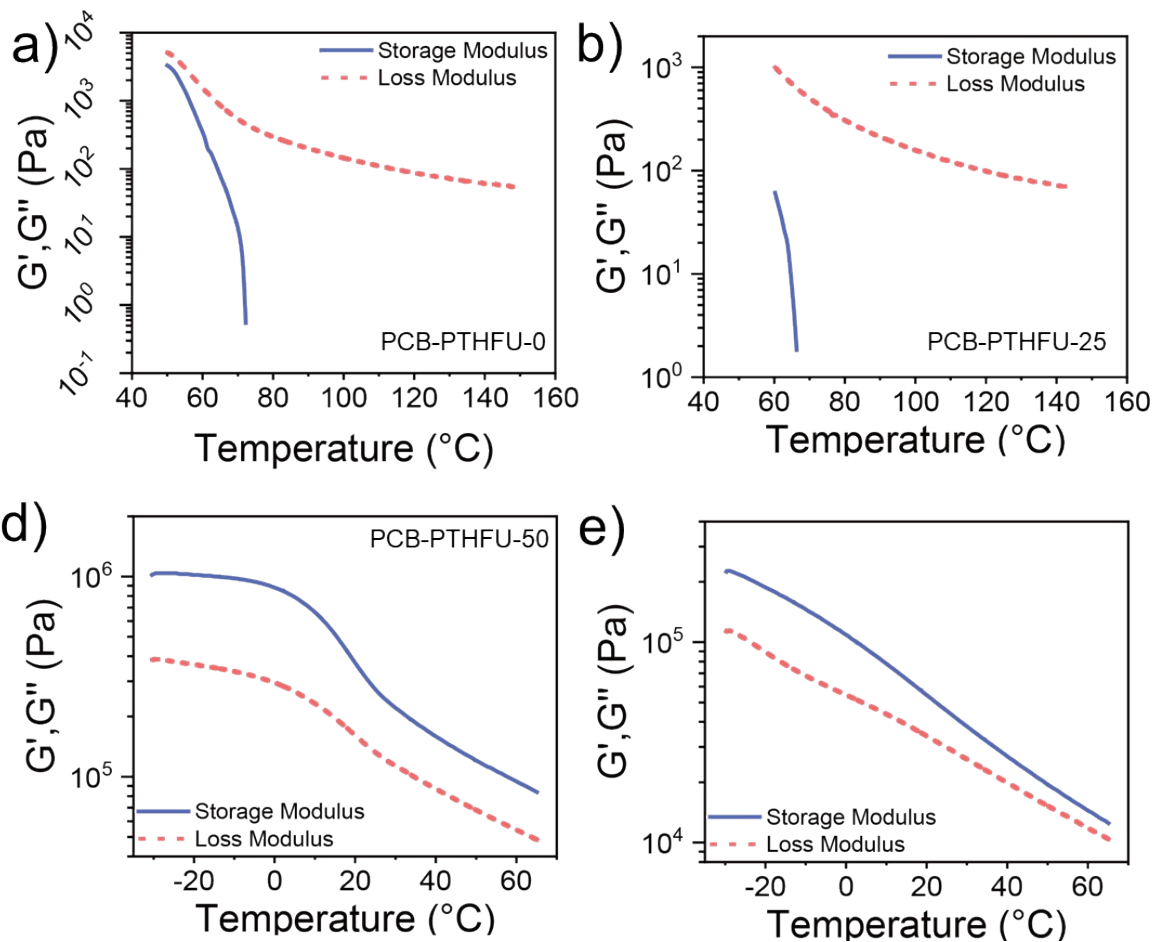

Figure S4. Temperature sweep rheological studies ( $> 60$   $^{\circ}\text{C}$ ) of a) PCB-PTHFU-0 and b) PCB-PTHFU-25. Temperature sweep rheological studies ( $-35$   $^{\circ}\text{C}$  to  $60$   $^{\circ}\text{C}$ ) of c) PCB-PTHFU-50 and d) PCB-PTHFU-75.

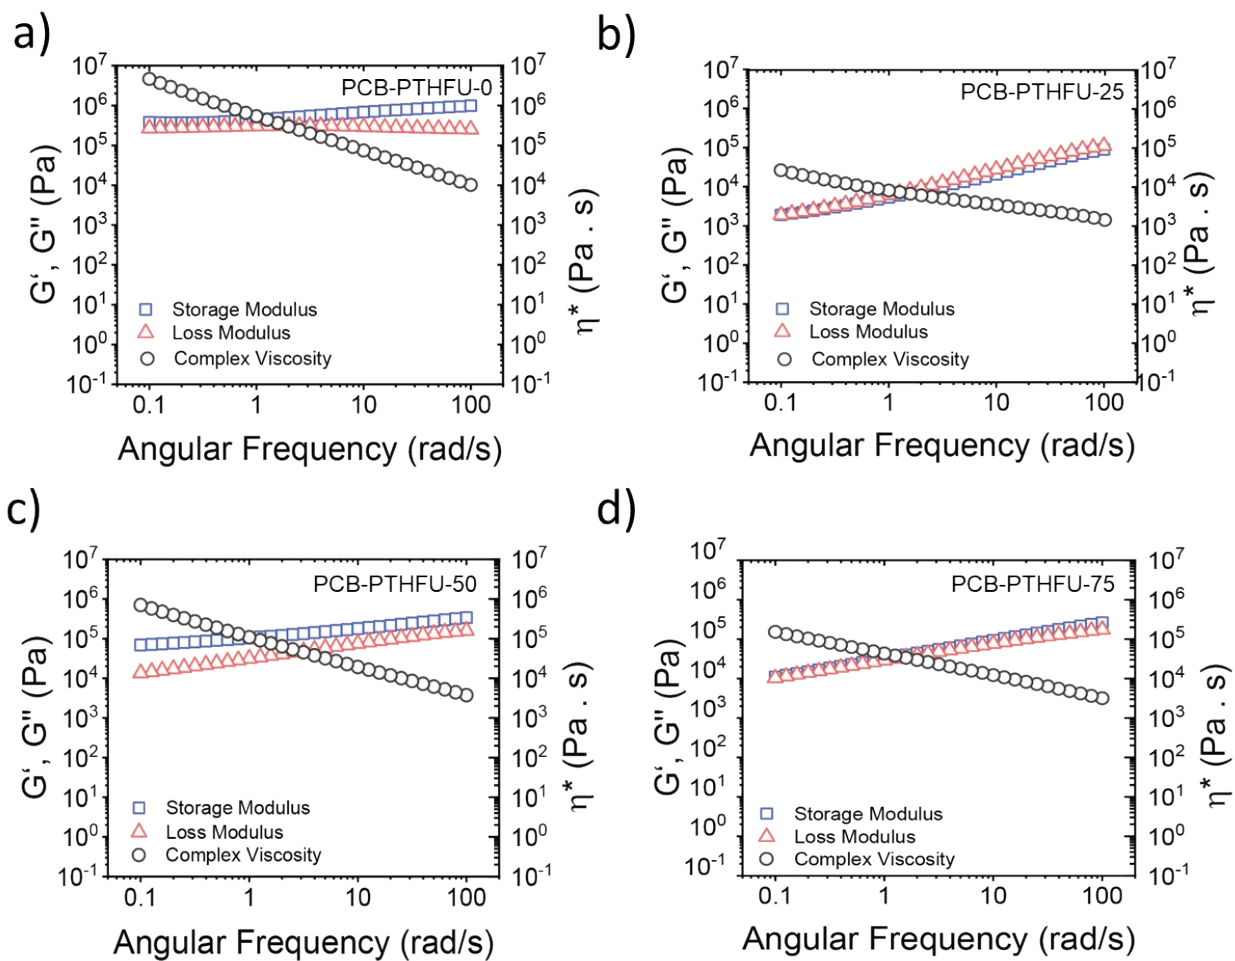

Figure S5. Frequency sweep rheological studies at 37 °C of a) PCB-PTHFU-0, b) PCB-PTHFU-25, c) PCB-PTHFU-50, and d) PCB-PTHFU-75.
